# Supplementary material for: The Appalbees menu: a multiyear, multilocus metagenetic assessment of pollen foraging by Appalachian Bombus affinis workers
Source: PeerJ. 2026 Jan 12;14:e20284. doi: 10.7717/peerj.20284 (PMC12805910; doi:10.7717/peerj.20284)
Supplement: Supplemental Information 3 — Note that the studies used different methodologies and criteria for reporting identifications. [file peerj-14-20284-s003.xlsx]

## Sheet: Detections by data set
Supplemental File S3. Plant genera detected in seven data sets of Bombus affinis foraging. If a genus was reported detected, a "1" is placed in the corresponding column. The values for the current study are after minimum abundance thresholds have been applied as described in the text. Region is designated for the purposes of comparative analysis as either Midwestern or Applalachian, or not applic…
Region class ->	Appalachian	Midwestern	Not applicable	Midwestern	Midwestern	Midwestern	Appalachian
Data class ->	Metabarcoding	Metabarcoding	Metabarcoding	Metabarcoding	Palynology	Observation	Observation
Genus	This study (Appalachian)	This study (Midwestern)	Simanonok et al. 2021	Simanonok et al. 2024	Simanonok et al. 2024	Wolf et al. 2022	Hepner et al. 2024		Total number of studies in which detected	Midwestern	Appalachian	Pollen	Observation	Count of classes
Eutrochium	1	1	1	1	1	1	1		7	Y	Y	Y	Y	4
Hydrangea	1	1	1	1	1	1	1		7	Y	Y	Y	Y	4
Allium	1	1	1	1	1	1			6	Y	Y	Y	Y	4
Cirsium	1	1	1	1		1	1		6	Y	Y	Y	Y	4
Daucus	1	1		1	1	1	1		6	Y	Y	Y	Y	4
Solidago	1	1	1		1	1	1		6	Y	Y	Y	Y	4
Ageratina	1	1	1	1	1		1		6	Y	Y	Y	Y	4
Eupatorium	1	1	1		1	1			5	Y	Y	Y	Y	4
Helianthus	1	1	1			1	1		5	Y	Y	Y	Y	4
Impatiens	1	1		1	1	1			5	Y	Y	Y	Y	4
Securigera	1	1	1			1			4	Y	Y	Y	Y	4
Trifolium	1		1	1	1	1	1		6	Y	Y	Y	Y	4
Actaea	1		1	1		1	1		5	Y	Y	Y	Y	4
Carduus	1			1	1	1	1		5	Y	Y	Y	Y	4
Hypericum	1			1	1	1	1		5	Y	Y	Y	Y	4
Campanula	1			1	1	1			4	Y	Y	Y	Y	4
Centaurea	1		1			1	1		4	Y	Y	Y	Y	4
Cichorium	1		1			1	1		4	Y	Y	Y	Y	4
Rosa	1			1	1	1			4	Y	Y	Y	Y	4
Rudbeckia	1		1	1		1			4	Y	Y	Y	Y	4
Thalictrum	1		1			1	1		4	Y	Y	Y	Y	4
Arctium	1			1	1		1		4	Y	Y	Y	Y	4
Plantago	1		1	1			1		4	Y	Y	Y	Y	4
Anemone	1		1			1			3	Y	Y	Y	Y	4
Euthamia	1					1	1		3	Y	Y	Y	Y	4
Pastinaca	1		1			1			3	Y	Y	Y	Y	4
Rhododendron	1					1	1		3	Y	Y	Y	Y	4
Rubus	1					1	1		3	Y	Y	Y	Y	4
Symphyotrichum	1		1			1			3	Y	Y	Y	Y	4
Taraxacum	1		1			1			3	Y	Y	Y	Y	4
Verbena	1					1			2	Y	Y	Y	Y	4
Vernonia	1					1			2	Y	Y	Y	Y	4
Melilotus			1	1	1	1	1		5	Y	Y	Y	Y	4
Nepeta				1	1	1	1		4	Y	Y	Y	Y	4
Monarda					1	1	1		3	Y	Y	Y	Y	4
Eryngium			1			1	1		3	Y	Y	Y	Y	4
Silphium		1		1	1	1			4	Y	N	Y	Y	3
Veronicastrum		1	1	1		1			4	Y	N	Y	Y	3
Senecio		1				1			2	Y	N	Y	Y	3
Spiraea		1				1			2	Y	N	Y	Y	3
Arnoglossum		1				1			2	Y	N	Y	Y	3
Clematis	1		1				1		3	N	Y	Y	Y	3
Sambucus	1		1		1				3	Y	Y	Y	N	3
Aralia	1						1		2	N	Y	Y	Y	3
Verbesina	1						1		2	N	Y	Y	Y	3
Acer	1			1					2	Y	Y	Y	N	3
Laportea	1			1					2	Y	Y	Y	N	3
Echinacea			1	1	1	1			4	Y	N	Y	Y	3
Liatris			1	1	1	1			4	Y	N	Y	Y	3
Medicago			1	1	1	1			4	Y	N	Y	Y	3
Solanum			1	1	1	1			4	Y	N	Y	Y	3
Lotus			1		1	1			3	Y	N	Y	Y	3
Brassica				1	1	1			3	Y	N	Y	Y	3
Sonchus			1	1		1			3	Y	N	Y	Y	3
Agastache						1	1		2	Y	Y	N	Y	3
Vicia					1	1			2	Y	N	Y	Y	3
Amorpha			1			1			2	Y	N	Y	Y	3
Chamaecrista			1			1			2	Y	N	Y	Y	3
Coriandrum			1			1			2	Y	N	Y	Y	3
Dalea			1			1			2	Y	N	Y	Y	3
Mentha				1		1			2	Y	N	Y	Y	3
Prunus			1			1			2	Y	N	Y	Y	3
Ratibida			1			1			2	Y	N	Y	Y	3
Asclepias						1	1		2	Y	Y	N	Y	3
Hibiscus						1	1		2	Y	Y	N	Y	3
Physostegia						1	1		2	Y	Y	N	Y	3
Pycnanthemum						1	1		2	Y	Y	N	Y	3
Lythrum		1	1						2	Y	N	Y	N	2
Sagittaria		1	1						2	Y	N	Y	N	2
Urtica		1		1					2	Y	N	Y	N	2
Lactuca		1							1	Y	N	Y	N	2
Oxypolis		1							1	Y	N	Y	N	2
Echium	1		1						2	N	Y	Y	N	2
Pinus	1		1						2	N	Y	Y	N	2
Rhus	1		1						2	N	Y	Y	N	2
Achillea	1								1	N	Y	Y	N	2
Aconitum	1								1	N	Y	Y	N	2
Adonis	1								1	N	Y	Y	N	2
Collinsonia	1								1	N	Y	Y	N	2
Crepis	1								1	N	Y	Y	N	2
Cryptotaenia	1								1	N	Y	Y	N	2
Erigeron	1								1	N	Y	Y	N	2
Galinsoga	1								1	N	Y	Y	N	2
Geum	1								1	N	Y	Y	N	2
Heliopsis	1								1	N	Y	Y	N	2
Hieracium	1								1	N	Y	Y	N	2
Ilex	1								1	N	Y	Y	N	2
Kalmia	1								1	N	Y	Y	N	2
Leucanthemum	1								1	N	Y	Y	N	2
Lysimachia	1								1	N	Y	Y	N	2
Monotropa	1								1	N	Y	Y	N	2
Myosotis	1								1	N	Y	Y	N	2
Osmorhiza	1								1	N	Y	Y	N	2
Oxydendrum	1								1	N	Y	Y	N	2
Phleum	1								1	N	Y	Y	N	2
Phytolacca	1								1	N	Y	Y	N	2
Ranunculus	1								1	N	Y	Y	N	2
Sisymbrium	1								1	N	Y	Y	N	2
Sorbus	1								1	N	Y	Y	N	2
Spiranthes	1								1	N	Y	Y	N	2
Tilia	1								1	N	Y	Y	N	2
Torilis	1								1	N	Y	Y	N	2
Verbascum	1								1	N	Y	Y	N	2
Sparganium			1	1	1				3	Y	N	Y	N	2
Astilbe				1	1				2	Y	N	Y	N	2
Helenium				1	1				2	Y	N	Y	N	2
Sorbaria				1	1				2	Y	N	Y	N	2
Blephilia						1			1	Y	N	N	Y	2
Chelone						1			1	Y	N	N	Y	2
Eurybia						1			1	Y	N	N	Y	2
Polymnia						1			1	Y	N	N	Y	2
Angelica						1			1	Y	N	N	Y	2
Aquilegia						1			1	Y	N	N	Y	2
Astera						1			1	Y	N	N	Y	2
Aureolaria						1			1	Y	N	N	Y	2
Barbarea						1			1	Y	N	N	Y	2
Buddleja						1			1	Y	N	N	Y	2
Claytonia						1			1	Y	N	N	Y	2
Coreopsis						1			1	Y	N	N	Y	2
Desmodium						1			1	Y	N	N	Y	2
Dicentra						1			1	Y	N	N	Y	2
Echinops						1			1	Y	N	N	Y	2
Gaillardia						1			1	Y	N	N	Y	2
Hasteola						1			1	Y	N	N	Y	2
Hydrophyllum						1			1	Y	N	N	Y	2
Hylotelephium						1			1	Y	N	N	Y	2
Lamprocapnos						1			1	Y	N	N	Y	2
Lespedeza						1			1	Y	N	N	Y	2
Lonicera						1			1	Y	N	N	Y	2
Lupinus						1			1	Y	N	N	Y	2
Mertensia						1			1	Y	N	N	Y	2
Napaea						1			1	Y	N	N	Y	2
Origanum						1			1	Y	N	N	Y	2
Pedicularis						1			1	Y	N	N	Y	2
Phlox						1			1	Y	N	N	Y	2
Platycodon						1			1	Y	N	N	Y	2
Primula						1			1	Y	N	N	Y	2
Pyrus						1			1	Y	N	N	Y	2
Ribes						1			1	Y	N	N	Y	2
Salvia						1			1	Y	N	N	Y	2
Scilla						1			1	Y	N	N	Y	2
Scrophularia						1			1	Y	N	N	Y	2
Symphytum						1			1	Y	N	N	Y	2
Thymus						1			1	Y	N	N	Y	2
Tradescantia						1			1	Y	N	N	Y	2
Veronica						1			1	Y	N	N	Y	2
Weigela						1			1	Y	N	N	Y	2
Prunella							1		1	N	Y	N	Y	2
Parthenocissus				1					1	Y	N	Y	N	2
Borago				1					1	Y	N	Y	N	2
Geranium					1				1	Y	N	Y	N	2
Hosta					1				1	Y	N	Y	N	2
Rhodiola				1					1	Y	N	Y	N	2
Sedum					1				1	Y	N	Y	N	2
Ambrosia			1						1	N	N	Y	N	1
Oenothera			1						1	N	N	Y	N	1
Amaranthus			1						1	N	N	Y	N	1
Artemisia			1						1	N	N	Y	N	1
Astragalus			1						1	N	N	Y	N	1
Bacopa			1						1	N	N	Y	N	1
Bassia			1						1	N	N	Y	N	1
Bromus			1						1	N	N	Y	N	1
Chenopodium			1						1	N	N	Y	N	1
Cicuta			1						1	N	N	Y	N	1
Cucumis			1						1	N	N	Y	N	1
Eriogonum			1						1	N	N	Y	N	1
Fagopyrum			1						1	N	N	Y	N	1
Glycine			1						1	N	N	Y	N	1
Glycyrrhiza			1						1	N	N	Y	N	1
Grindelia			1						1	N	N	Y	N	1
Linaria			1						1	N	N	Y	N	1
Nuttallanthus			1						1	N	N	Y	N	1
Panicum			1						1	N	N	Y	N	1
Persicaria			1						1	N	N	Y	N	1
Phalaris			1						1	N	N	Y	N	1
Quercus			1						1	N	N	Y	N	1
Salix			1						1	N	N	Y	N	1
Sium			1						1	N	N	Y	N	1
Triticum			1						1	N	N	Y	N	1
Zea			1						1	N	N	Y	N	1

## Sheet: Cited literature
Literature cited:
Hepner MJ, Orcutt E, Price K, Goodell K, Roulston T, Jean RP, Richardson RT. 2024. Montane Central Appalachian forests provide refuge for the critically endangered rusty patched bumble bee (Bombus affinis). Forest Ecology and Management 556:121751. DOI: 10.1016/j.foreco.2024.121751
Simanonok MP, Evans E, Otto CR, Cornman RS, Iwanowicz DD, Smith TA. 2024. Floral Composition of Pollen Collected from a Rusty Patched Bumble Bee (Bombus affinis, Cresson) Nest in Southeastern Minnesota. Prairie Naturalist 56:27–41. Available at: https://pubs.usgs.gov/publication/70257059
Simanonok MP, Iwanowicz DD, Raines CD, Wood TJ, Isaacs R, Cornman RS, Otto CR. 2023. Comparison of microscopy and metabarcoding to identify pollen used by the critically endangered rusty patched bumble bee, Bombus affinis. Insect Conservation and Diversity 16:205–216. DOI: 10.1111/icad.12622
Simanonok MP, Otto CR, Cornman RS, Iwanowicz DD, Strange JP, Smith TA. 2021. A century of pollen foraging by the endangered rusty patched bumble bee (Bombus affinis): inferences from molecular sequencing of museum specimens. Biodiversity and Conservation 30:123–137. DOI: 10.1007/s10531-020-02081-8
Wolf AT, Watson JC, Hyde TJ, Carpenter SG, Jean RP. 2022. Floral resources used by the endangered rusty patched bumble bee (Bombus affinis) in the Midwestern United States. Natural Areas Journal 42:301–312. DOI: 10.3375/22-2
